# Supplementary material for: Binding of PFOS to serum albumin and DNA: insight into the molecular toxicity of perfluorochemicals
Source: PubMed Central journal article supplement (PMC2656506; doi:10.1186/1471-2199-10-16), 2009-02-25
Supplement: 1471-2199-10-16-S1.pdf [file 1471-2199-10-16-S1.pdf]

**Table 1**

Determination Results of PFOS by the CPC-ECR colorimetric method and HPLC-MS

(n=3)

| C <sub>LO</sub> . PFOS<br>(mg/l) | CPC-ECR<br>(mg/l) | HPLC-MS<br>(µg/l) |
|----------------------------------|-------------------|-------------------|
| 100.0                            | 18.30±0.121       | 17.77±0.003       |
| 150.0                            | 59.42±0.022       | 57.77±0.003       |
| 200.1                            | 88.79±0.034       | 87.50±0.004       |
