# Supplementary material for: Binding of PFOS to serum albumin and DNA: insight into the molecular toxicity of perfluorochemicals
Source: PubMed Central journal article supplement (PMC2656506; doi:10.1186/1471-2199-10-16), 2009-02-25
Supplement: 1471-2199-10-16-S2.pdf [file 1471-2199-10-16-S2.pdf]

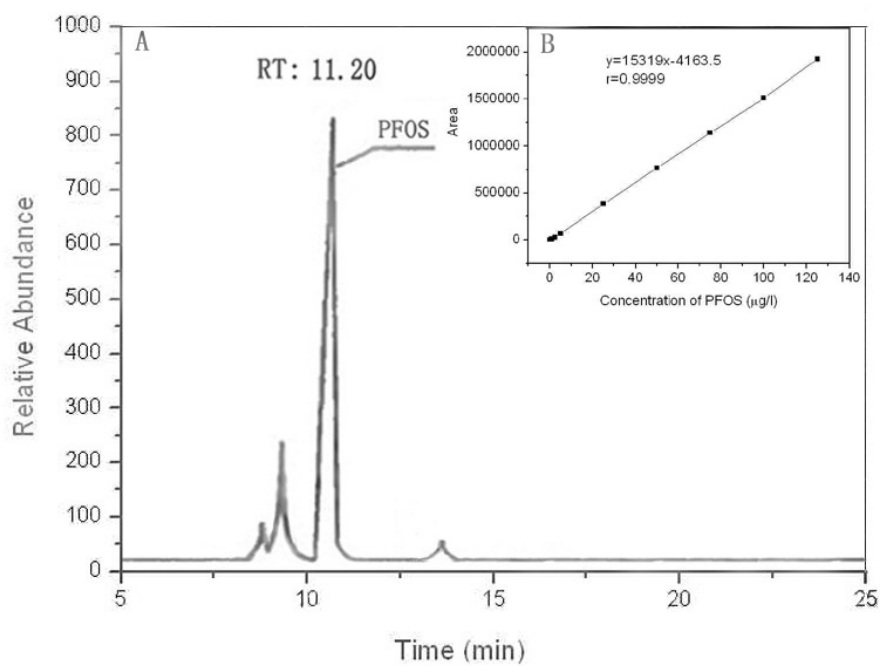

**Additional Figure** Determination of PFOS by HPLC-MS.

### Reference

Kannan, K; Choi, J; Iseki, N; Senthilkumar, K; Kim, DH; Masunaga, S; Giesy, JP. **Concentrations of perfluorinated acids in livers of birds from Japan and Korea.** *Chemosphere* 2002c, **49**:225-231.
